# Supplementary material for: Synthesis and Characterization of Green ZnO@polynaniline/Bentonite Tripartite Structure (G.Zn@PN/BE) as Adsorbent for As (V) Ions: Integration, Steric, and Energetic Properties
Source: MDPI journal article supplement (doi:10.3390/polym14122329), 2022-06-09
Supplement: s1 [file s1]

# Synthesis and Characterization of Green ZnO@polynaniline/Bentonite Tripartite Structure (G.Zn@PN/BE) as Adsorbent for As (V) Ions: Integration, Steric, and Energetic Properties

Mohamed Abdel Salam <sup>1</sup>, Mohamed Mokhtar <sup>1</sup>, Soha M. Albukhari <sup>1</sup>, Doaa F. Baamer <sup>1</sup>, Leonardo Palmisano <sup>2</sup>, Mariusz Jaremko <sup>3</sup> and Mostafa R. Abukhadra <sup>4,5,\*</sup>

<sup>1</sup> Department of Chemistry, Faculty of Science, King Abdulaziz University, P.O. Box 80200, Jeddah 21589, Saudi Arabia; mabdelsalam@kau.edu.sa (M.A.S.); mmoustafa@kau.edu.sa (M.M.); salbukhari@kau.edu.sa (S.M.A.); dfbaamer@kau.edu.sa (D.F.B.)

<sup>2</sup> Schiavello-Grillone Photocatalysis Group, Dipartimento di Ingegneria, Università degli Studi di Palermo, Viale delle Scienze (Ed. 6), 90128 Palermo, Italy; leonardo.palmisano@unipa.it

<sup>3</sup> Smart-Health Initiative (SHI), Red Sea Research Center (RSRC), Biological and Environmental Science and Engineering (BESE) Division, King Abdullah University of Science and Technology (KAUST), P.O. Box 4700, Thuwal 23955-6900, Saudi Arabia; mariusz.jaremko@kaust.edu.sa

<sup>4</sup> Geology Department, Faculty of Science, Beni-Suef University, Beni-Suef City 62511, Egypt

<sup>5</sup> Materials Technologies and Their Applications Lab, Geology Department, Faculty of Science, Beni-Suef University, Beni-Suef City 62111, Egypt

\* Correspondence: abukhadra89@science.bsu.edu.eg

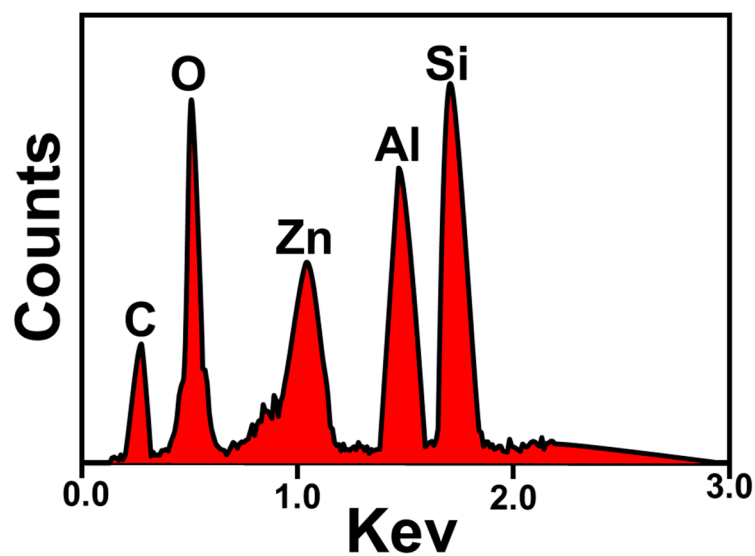

**Figure S1.** EDX spectrum of the synthetic G.Zn@PN/BE green composite.

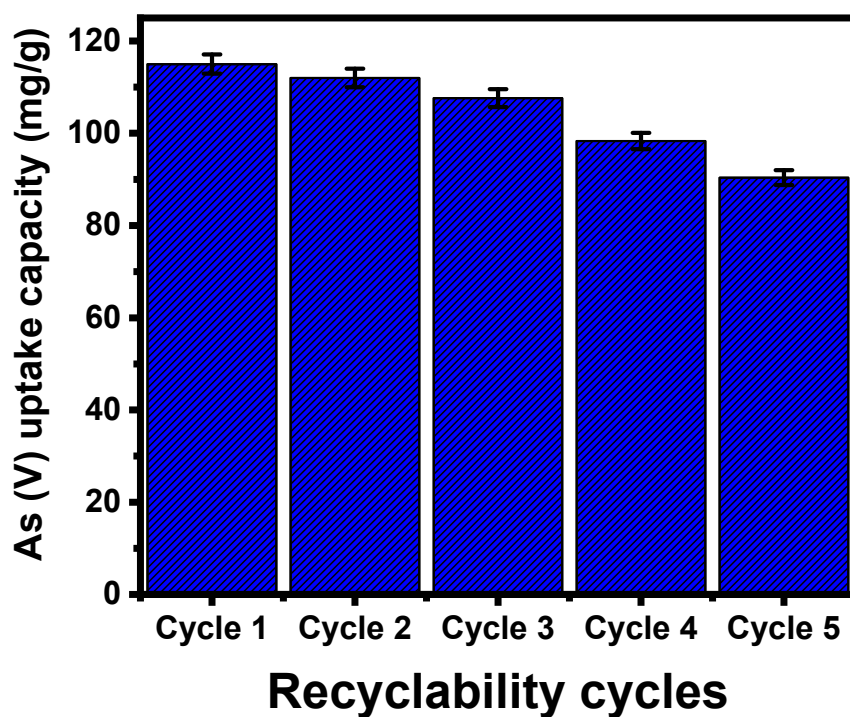

**Figure S2.** Recyclability of G.Zn@PN/BE during the retention of As (V) ions from water.

**Table S1.** Nonlinear equations of kinetic, classic isotherm, and advanced isotherm models.

| Kinetic models                                     |                                                                                                              |                                                                                                                                                                                                                                                                         |
|----------------------------------------------------|--------------------------------------------------------------------------------------------------------------|-------------------------------------------------------------------------------------------------------------------------------------------------------------------------------------------------------------------------------------------------------------------------|
| Model                                              | Equation                                                                                                     | Parameters                                                                                                                                                                                                                                                              |
| Pseudo-first-order                                 | $Q_t = Q_e (1 - e^{-k_1 t})$                                                                                 | $Q_t$ (mg/g) is the adsorbed ions at time (t), and $K_1$ is the rate constant of the first-order adsorption (1/min)                                                                                                                                                     |
| Pseudo-second-order                                | $Q_t = \frac{Q_e^2 k_2 t}{1 + Q_e k_2 t}$                                                                    | $Q_e$ is the quantity of adsorbed ions after equilibration (mg/g), and $K_2$ is the model rate constant (g/mg min).                                                                                                                                                     |
| Classic Isotherm models                            |                                                                                                              |                                                                                                                                                                                                                                                                         |
| Model                                              | Equation                                                                                                     | Parameters                                                                                                                                                                                                                                                              |
| Langmuir                                           | $Q_e = \frac{Q_{max} b C_e}{(1 + b C_e)}$                                                                    | $C_e$ is the rest ions concentrations (mg/L), $Q_{max}$ is the theoretical maximum adsorption capacity (mg/g), and $b$ is the Langmuir constant (L/mg)                                                                                                                  |
| Freundlich                                         | $Q_e = K_f C_e^{1/n}$                                                                                        | $K_f$ (mg/g) is the constant of the Freundlich model related to the adsorption capacity and $n$ is the constant of the Freundlich model related to the adsorption intensities                                                                                           |
| Dubinin–Radushkevich                               | $Q_e = Q_m e^{-\beta \varepsilon^2}$                                                                         | $\beta$ (mol <sup>2</sup> /KJ <sup>2</sup> ) is the D-R constant, $\varepsilon$ (KJ <sup>2</sup> /mol <sup>2</sup> ) is the polanyiil potential, and $Q_m$ is the adsorption capacity (mg/g)                                                                            |
| Advanced isotherm models                           |                                                                                                              |                                                                                                                                                                                                                                                                         |
| Model                                              | Equation                                                                                                     | Parameters                                                                                                                                                                                                                                                              |
| Monolayer model with one energy site (Model 1)     | $Q = n N_o = \frac{n N_M}{1 + (\frac{C1}{C})^n} = \frac{Q_o}{1 + (\frac{C1}{C})^n}$                          | $Q$ is the adsorbed quantities in mg/g<br>$n$ is the number of adsorbed ions per site                                                                                                                                                                                   |
| Monolayer model with two energy sites (Model 2)    | $Q = \frac{n_1 N_{1M}}{1 + (\frac{C_1}{C})^{n_1}} + \frac{n_2 N_{2M}}{1 + (\frac{C_2}{C})^{n_2}}$            | $N_m$ is the density of the effective receptor sites (mg/g)<br>$Q_o$ is the adsorption capacity at the saturation state in mg/g                                                                                                                                         |
| Double layer model with one energy site (Model 3)  | $Q = Q_o \frac{(\frac{C}{C1/2})^n + 2(\frac{C}{C1/2})^{2n}}{1 + (\frac{C}{C1/2})^n + (\frac{C}{C1/2})^{2n}}$ | $C1/2$ is the concentration of the ions at half saturation stage in mg/L                                                                                                                                                                                                |
| Double layer model with two energy sites (Model 3) | $Q = Q_o \frac{(\frac{C}{C1})^n + 2(\frac{C}{C2})^{2n}}{1 + (\frac{C}{C1})^n + (\frac{C}{C2})^{2n}}$         | $C1$ and $C2$ are the concentrations of the ions at the half saturation stage for the first active sites and the second active sites, respectively<br>$n1$ and $n2$ are the adsorbed ions per site for the first active sites and the second active sites, respectively |
